# Supplementary figures and images for: Synthesis and biological evaluation of novel derivatives of gambogenic acid as anticancer agents
Source: Royal Society of Chemistry journal article supplement (doi:10.1039/c4md00407h), 2014-10-17

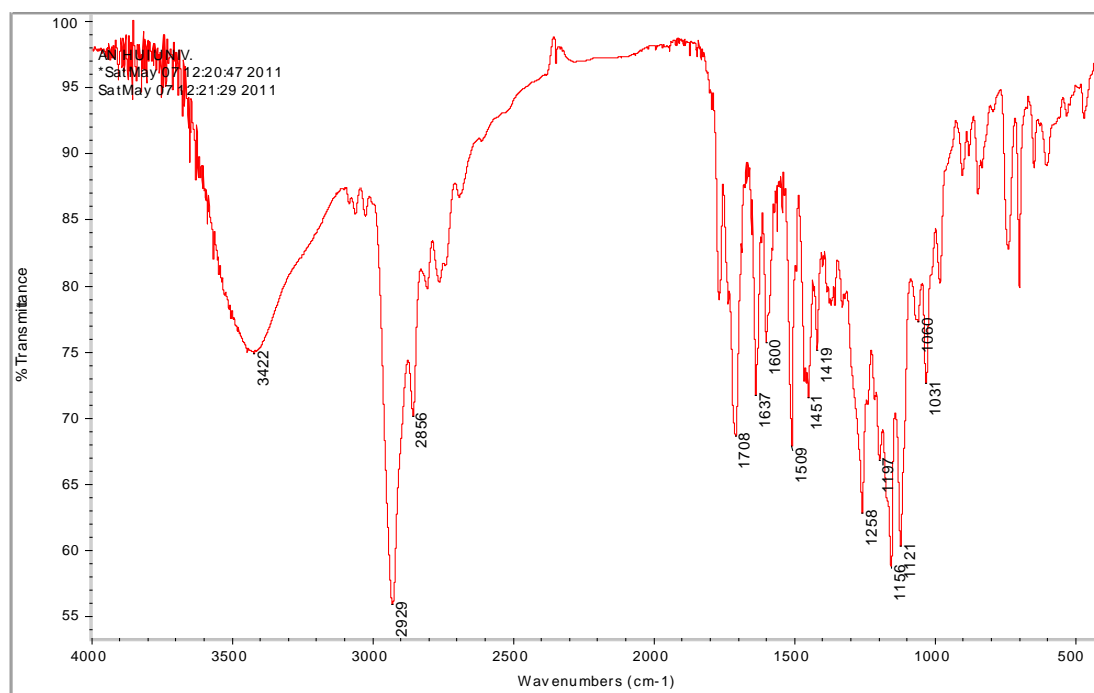

**Fig 1.** IR of 3f

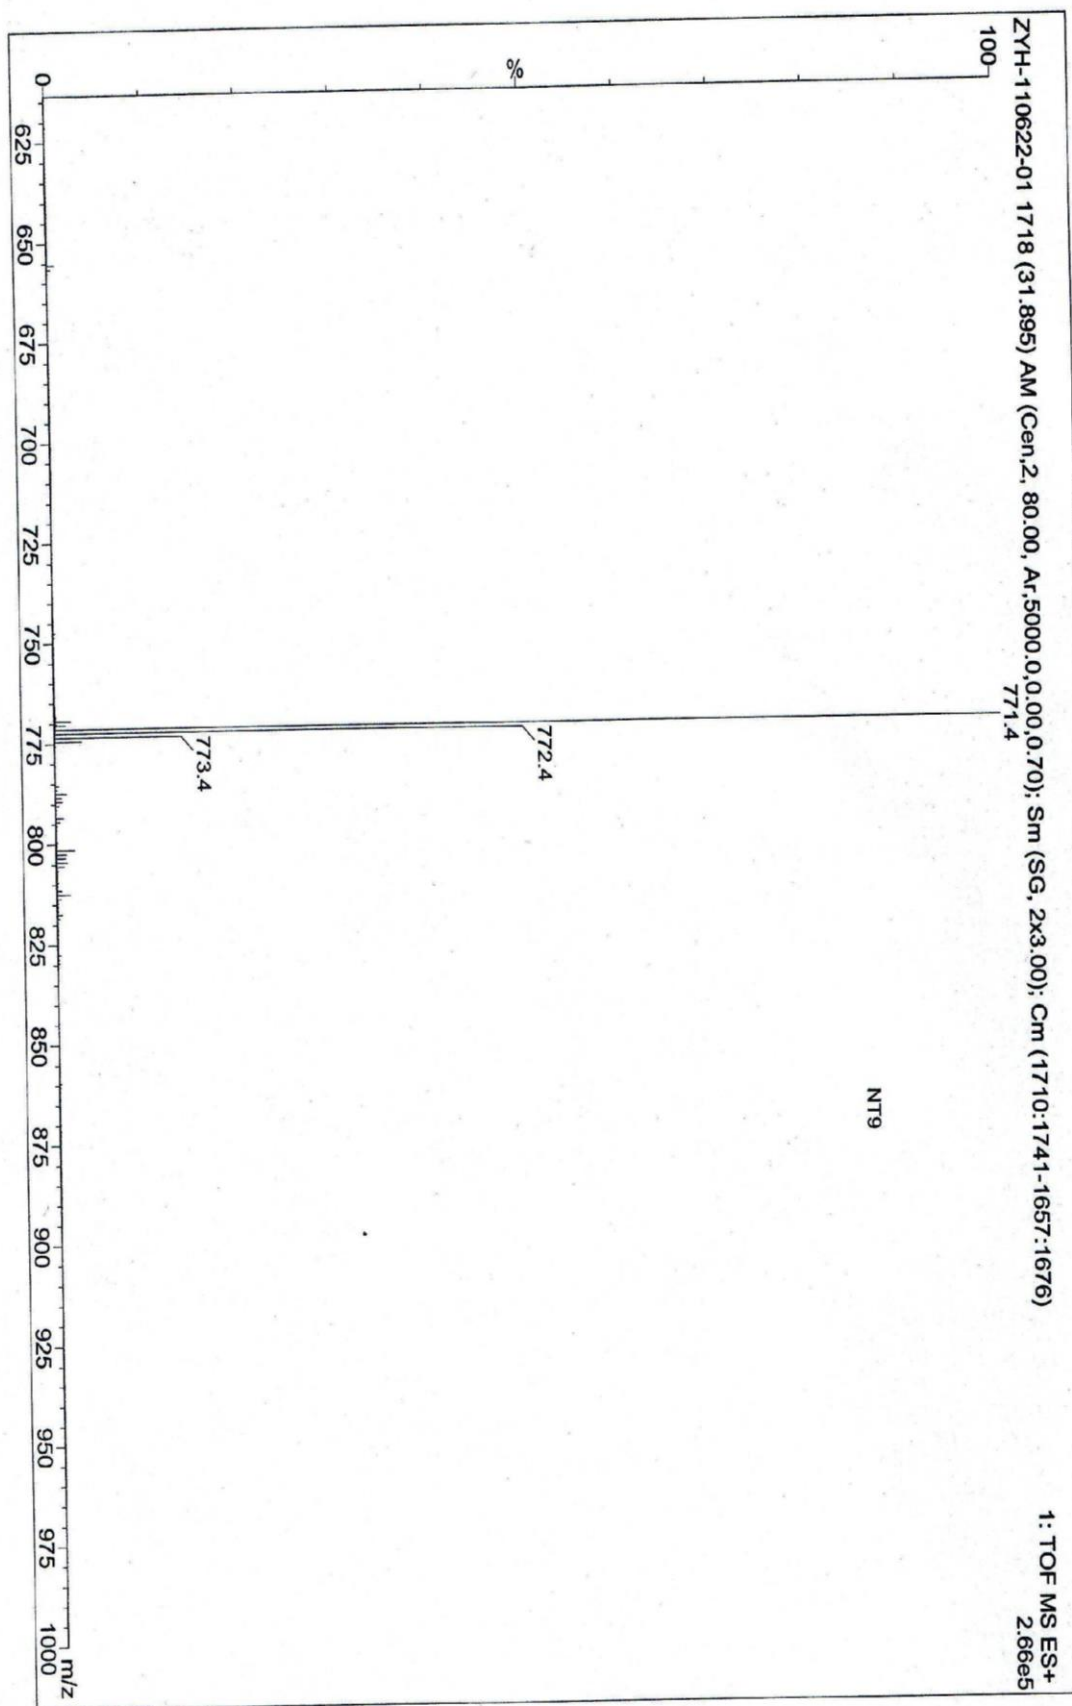

Fig 2. MS of 3f

Supplement: c4md00407h1.zip [file c4md00407h1.zip]
